# Supplementary material for: Molecular Assessment of Epiretinal Membrane: Activated Microglia, Oxidative Stress and Inflammation
Source: PubMed Central journal article supplement (PMC7465764; doi:10.3390/antiox9080654), 2020-07-23
Supplement: antioxidants-09-00654-s001.pdf [file antioxidants-09-00654-s001.pdf]

## Supplementary file

Table S1. List of antibodies.

| S.No. | Antibodies                            | Catalog No.      |
|-------|---------------------------------------|------------------|
| 1.    | Anti-GFAP                             | Dako Z0334       |
| 2.    | Anti-CRALBP                           | ab15051, Abcam   |
| 3.    | Anti-Aldh1L1                          | ab190298, Abcam  |
| 4.    | Anti-F4/80                            | ab16911, Abcam   |
| 5.    | Anti-CD11b                            | ab133357, Abcam  |
| 5.    | Anti-OXR1                             | HPA027395 Sigma  |
| 6.    | Anti-Iba1                             | ab178680, Abcam  |
| 7.    | Alexa Fluor® 488 Goat Anti-Rabbit IgG | 11008-Invitrogen |
| 8.    | Alexa Fluor® 488 Goat Anti-Mouse IgG  | ab150117, Abcam  |

Table S2. List of qPCR primers

| S. No. | Gene           | Forward                  | Reverse                   |
|--------|----------------|--------------------------|---------------------------|
| 1.     | <i>β-actin</i> | CATGTACGTTGCTATCCAGGC    | CTCCTTAATGTCACGCACGAT     |
| 2.     | <i>Hif1-α</i>  | CCAGCAGACTCAAATACAAGAACC | TGTATGTGGGTAGGAGATGGAGAT  |
| 3.     | <i>OXR1</i>    | CTGATGGTGATTAAAG ACAGTG  | CACTTAAAGACCTCAAATC C     |
| 4.     | <i>NRF2</i>    | AGTGGATCTGCCAACTACTC     | CATCTACAAACGGGAATGTCTG    |
| 5.     | <i>VEGF165</i> | ATCTTCAAGCCATCCTGTGTGC   | CAAGGCCACAGGGATTTTC       |
| 6.     | <i>CD11b</i>   | CAGACAGGAAGTAGCAGCTCCT   | CTGGTCATGTTGATGAAGGTGCT   |
| 7.     | <i>MMP9</i>    | TTGACAGCGACAAGAAGTGG     | GCCATTCACGTCGTCCTTAT      |
| 8.     | <i>DKK1</i>    | GATCATAGCACCTTGGATGGG    | GGCACAGTCTGATGACCGG       |
| 9.     | <i>ERK1</i>    | CCTGCGACCTTAAGATTG TGATT | CAGGGAAGATGGGCCGGTTA GAGA |
| 10.    | <i>NOTCH1</i>  | TTGGGAGGAGCAGATTTTTG     | CACTGGCATGACACACAACA      |

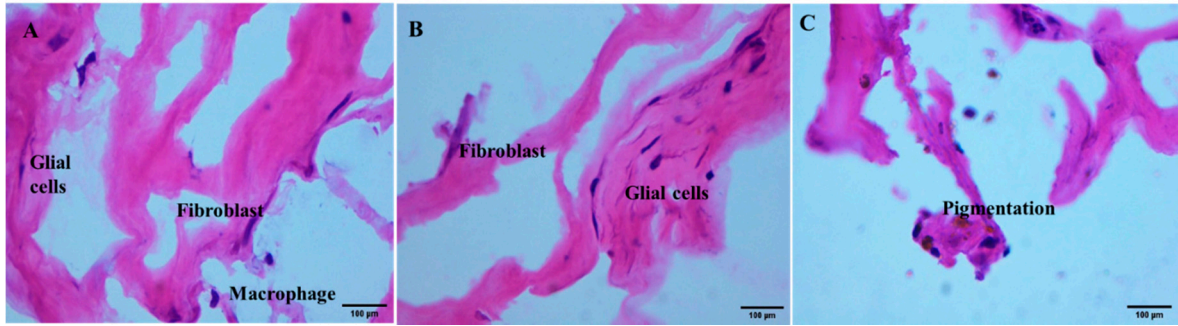

**Figure S1.** Representative image showing the glial cells with clear spindle shaped structure of the cells and their long thin processes. Macrophages were also seen with round darkly stained structure. Pigmentation was also observed in the membranes.

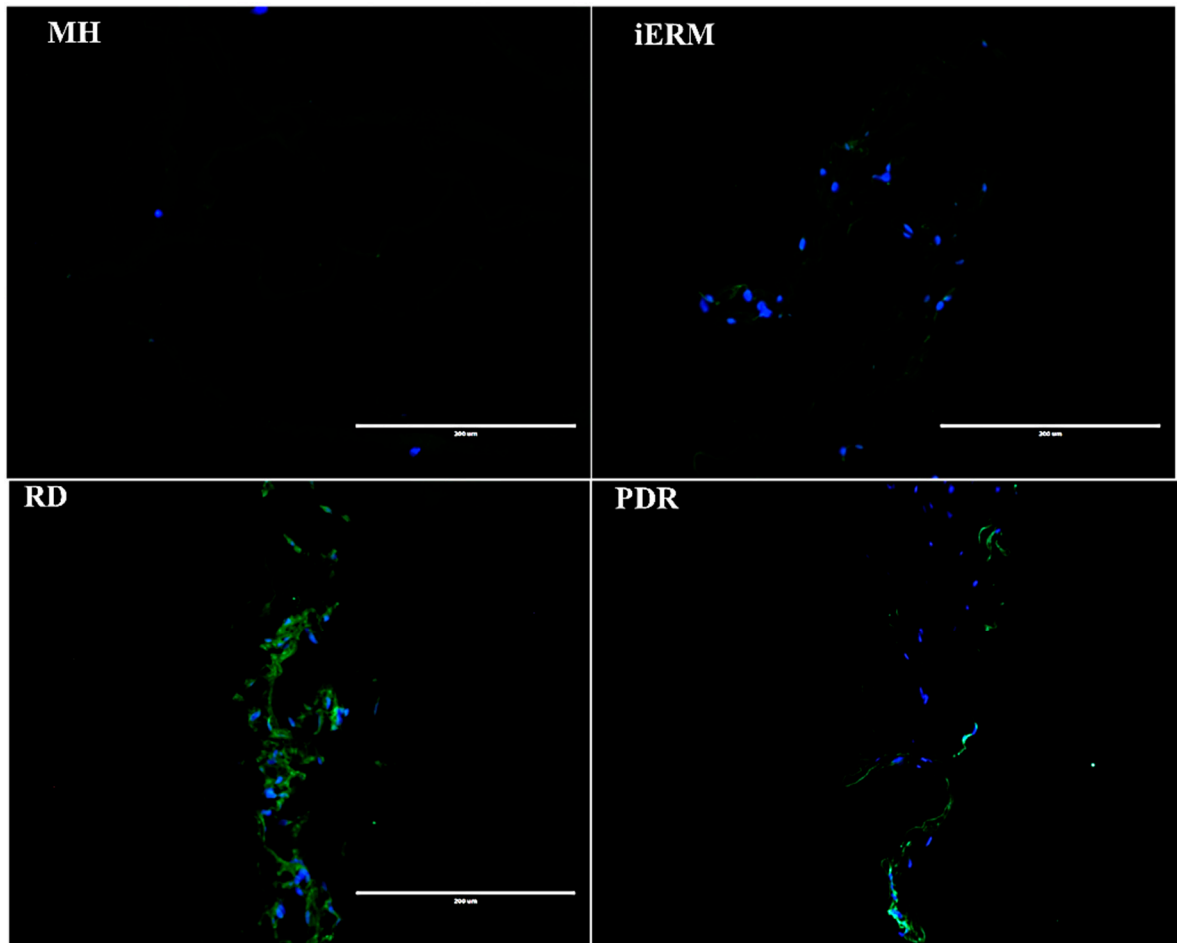

**Figure S2.** Characterization of Muller glia cells using AldH1L1 (a specific marker for muller glia) in MH, iERM, PDR and RD membranes.
